# Supplementary material for: Prevalence of Diabetic Kidney Disease with Different Subtypes in Hospitalized Patients with Diabetes and Correlation Between eGFR and LncRNA XIST Expression in PBMCs
Source: Springer Nature journal article supplement (doi:10.1007/s13300-023-01439-9), 2023-07-09
Supplement: MOESM1 [file 25596306]

## **Supplemental Information**

### **Prevalence of diabetic kidney disease with different subtypes in hospitalized patients with diabetes and correlation between eGFR and LncRNA XIST expression in PBMCs**

**Yingbei Lin<sup>1†</sup>, Peili Wu<sup>1†</sup>, Lei Guo<sup>1†</sup>, Qijian Feng<sup>1</sup>, Ling Wang<sup>1</sup>, Xiaochun Lin<sup>1</sup>, Chuyi Yang<sup>1</sup>, Nannan Liu<sup>1</sup>, Churan Wen<sup>1</sup>, Xuelin Li<sup>1</sup>, Xiaoqin Ma<sup>1</sup>, Yaoming Xue<sup>1</sup>, Meiping Guan<sup>\*1</sup>**

<sup>1</sup>Department of Endocrinology and Metabolism, Nanfang Hospital, Southern Medical University, Guangdong, China.

<sup>†</sup>These authors contributed equally to this work and share the first authorship.



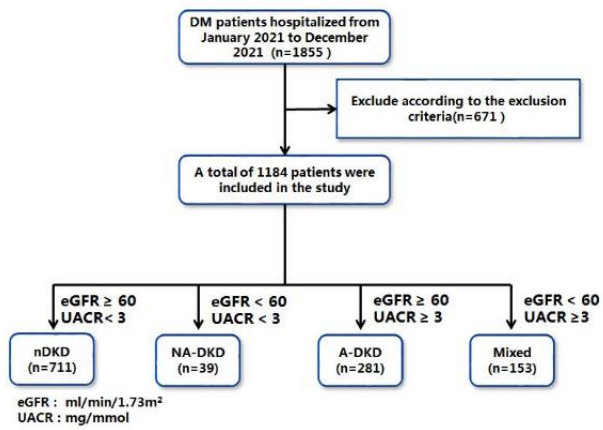

**Fig. S1** Flow chart of patients' selection

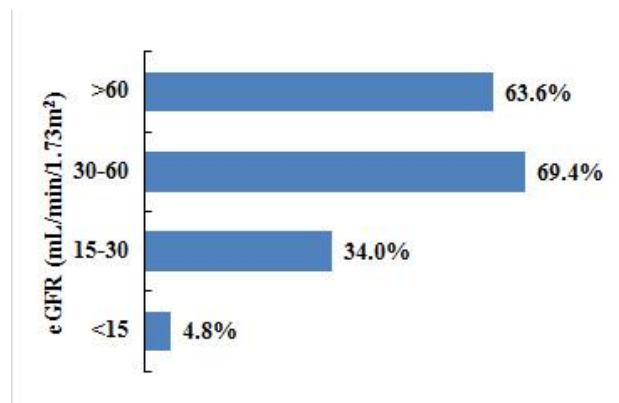

**Fig. S2** The rate of the use of SGLT2i or GLP1RA with different eGFR level.

**Table S1** Exclusion criteria for study participants

| exclusion criteria                                                                                                                                                              |
|---------------------------------------------------------------------------------------------------------------------------------------------------------------------------------|
| 1. Patients with severe infection, ulcer of lower extremity or gangrene(n=303).                                                                                                 |
| 2. Acute complications in diabetes mellitus such as ketoacidosis, hyperosmolar and hypoglycemia coma (n=35).                                                                    |
| 3. Endocrine system diseases except DM, including Cushing's syndrome, pheochromocytoma, primary aldosteronism, pituitary hyperfunction or hypofunction, hyperthyroidism (n=86). |
| 4. Patients use of nephrotoxic drugs(n=0).                                                                                                                                      |
| 5. Malignant diseases(n=71).                                                                                                                                                    |
| 6. Severe disfunction in liver and kidney or cardiac insufficiency(n=8).                                                                                                        |
| 7. Patients younger than 18 years old(n=16).                                                                                                                                    |
| 8. Participants with insufficient UACR or eGFR data (n=68).                                                                                                                     |
| 9. Include in any clinical drug trials(n=10).                                                                                                                                   |
| 10. Acute Trauma(n=5).                                                                                                                                                          |
| 11. Biopsy-proven diagnosis of non-diabetic nephropathy(n=12).                                                                                                                  |
| 12. A history of renal transplantation or nephrectomy(n=7).                                                                                                                     |
| 13. Autoimmune diseases except T1DM, such as systemic lupus erythematosus et al.(n=21).                                                                                         |
| 14. Hematologic diseases(n=7).                                                                                                                                                  |
| 15. Amputation or paraplegia(n=2).                                                                                                                                              |
| 16. Pregnant women and specific types of diabetes(n=20).                                                                                                                        |

**Table S2** The sequences of primers used for RT-PCR

| Gene           | Forward primer (5'-3')   | Reverse primer (3'-5')   |
|----------------|--------------------------|--------------------------|
| $\beta$ -actin | GGGAAATCGTGCGTGACATTAAGG | CAGGAAGGAAGGCTGGAAGAG    |
| XIST           | ACGCTGCATGTGTCCTTAGTAGTC | ATTGGAGCCTCTTATAGCTGTTTG |

**Table S3** The use of hypoglycemic drug of the study groups.

| Medication Use   | Overall<br>(n=1184) | nDKD<br>(n=711) | NA-<br>DKD<br>(n=39) | A-DKD<br>(n=281) | Mixed<br>(n=153) | P      |
|------------------|---------------------|-----------------|----------------------|------------------|------------------|--------|
| Glucose-lowering |                     |                 |                      |                  |                  |        |
| SGLT2i           | 595<br>(50.3%)      | 369<br>(51.9%)  | 18<br>(46.2%)        | 160<br>(56.9%)   | 48<br>(31.4%)    | <0.001 |
| GLP1RA           | 325<br>(27.4%)      | 176<br>(24.8%)  | 10<br>(25.6%)        | 89<br>(31.7%)    | 50<br>(32.7%)    | 0.064  |
| SGLT2i+GLP1RA    | 186<br>(15.7%)      | 104<br>(14.6%)  | 4<br>(10.3%)         | 59<br>(21.0%)    | 19<br>(12.4%)    | 0.034  |
| Others           | 450<br>(38.0%)      | 270<br>(38.0%)  | 15<br>(38.5%)        | 91<br>(32.4%)    | 74<br>(48.4%)    | 0.013  |

|                 |                |                |              |               |               |       |
|-----------------|----------------|----------------|--------------|---------------|---------------|-------|
| RAAS inhibitors | 358<br>(30.2%) | 218<br>(30.7%) | 9<br>(23.1%) | 78<br>(27.8%) | 53<br>(34.6%) | 0.357 |
|-----------------|----------------|----------------|--------------|---------------|---------------|-------|

Note: All values are expressed as mean  $\pm$  SD or Median (interquartile range).  
SGLT2i=Sodium-dependent glucose transporters 2 inhibitors, GLP-1RA =Glucagon-like peptide 1 receptor agonist.

**Table S4** 24hour Urine biochemical indexes of the study groups.

|                          | Overall<br>(n=1184)   | nDKD<br>(n=711)       | NA-DKD<br>(n=39)          | A-DKD<br>(n=281)                | Mixed<br>(n=153)                | P          |
|--------------------------|-----------------------|-----------------------|---------------------------|---------------------------------|---------------------------------|------------|
| K<br>(mmol/24h)          | 33.8<br>(25.2,44.4)   | 34.3<br>(25.9,44.7)   | 25.7<br>(18.0,39.7)<br>*  | 32.7<br>(25.2,44.8)             | 33.6<br>(24.4,44.3)             | 0.024      |
| Na<br>(mmol/24h)         | 114.5<br>(76.8,161.7) | 117.2<br>(81.0,162.7) | 93.4<br>(57.8,121.0)<br>* | 108.8<br>(69.9,156.3)           | 111.2<br>(77.7,171.4)<br>#      | 0.01       |
| $\beta_2$ -MGU<br>(mg/L) | 0.18<br>(0.07,0.26)   | 0.17<br>(0.06,0.18)   | 0.18<br>(0.06,0.95)       | 0.18<br>(0.07,0.27)             | 2.35<br>(0.32,18.08)<br>***, #  | <0.00<br>1 |
| TP<br>(g/24h)            | 0.12<br>(0.08,0.25)   | 0.09<br>(0.07,0.12)   | 0.12<br>(0.07,0.19)       | 0.25<br>(0.14,0.51)<br>***, ### | 1.45<br>(0.45,4.64)<br>***, ### | <0.00<br>1 |
| Albumin<br>(mg/24h)      | 20<br>(11,78)         | 14<br>(9,20)          | 14<br>(8,21)              | 91<br>(38,285)<br>***, ###      | 874<br>(157,2953)<br>***, ###   | <0.00<br>1 |
| CR<br>( $\mu$ mol/24h)   | 10068<br>(7575,13582) | 10358<br>(8569,14000) | 9907<br>(6659,15748)      | 9680<br>(6235,12738)<br>*       | 9232<br>(6826,12358)<br>*       | 0.005      |

Note: All values are expressed as mean  $\pm$  SD or Median (interquartile range).  
K=Potassium. Na= Sodium.  $\beta_2$ -MGU= $\beta_2$ -microglobulin. TP=total protein.  
CR=Creatinine  
vs nDKD : \*p<0.05, \*\*p<0.01, \*\*\*p<0.001. vs NA-DKD : #p<0.05, ##p<0.01, ###p<0.001

**Table S5** The grade of hypertension of the study groups.

| Grade | Overall<br>(n=1184) | nDKD<br>(n=711) | NA-DKD<br>(n=39) | A-DKD<br>(n=281) | Mixed<br>(n=153) |
|-------|---------------------|-----------------|------------------|------------------|------------------|
| non   | 538 (45.4%)         | 427 (60.1%)     | 14 (35.9%)       | 82 (29.2%)       | 15 (9.8%)        |
| 1     | 155 (13.1%)         | 93 (13.1%)      | 6 (15.4%)        | 41 (14.6%)       | 15 (9.8%)        |
| 2     | 223 (18.9%)         | 98 (13.8%)      | 9 (23.1%)        | 76 (27%)         | 40 (26.1%)       |
| 3     | 267 (22.6%)         | 92 (13%)        | 10 (25.6%)       | 82 (29.2%)       | 83 (54.2%)       |

| Overall             | 1183 (100%) | 710 (100%) | 39 (100%) | 281 (100%) | 153 (100%) |
|---------------------|-------------|------------|-----------|------------|------------|
| Z value             |             | Reference  | -3.207    | -9.303     | -13.120    |
| P value (vs nDKD)   |             | -          | 0.001     | <0.001     | <0.001     |
| Z value             |             |            | Reference | -0.839     | -5.883     |
| P value (vs NA-DKD) |             |            | -         | 0.397      | <0.001     |

**Table S6** Clinical data of female patients with DKD

| Characteristics                      | n=31               |
|--------------------------------------|--------------------|
| eGFR (mL/min/1.73m <sup>2</sup> )    | 73.9±29.72         |
| UACR (mg/mmol)                       | 18.38 (4.83,30.68) |
| Age (y)                              | 60.55±13.56        |
| Body mass index (kg/m <sup>2</sup> ) | 27.53±7.79         |
| Urea(mmol/L)                         | 6.1 (4.95,8.65)    |
| CR(μmol/L)                           | 74.5 (58.25,99.5)  |
| UA(μmol/L)                           | 364.68±69.89       |
| TG (mmol/L)                          | 1.92 (1.38,2.4)    |
| Total cholesterol (mmol/L)           | 5.41 (4.58,6.46)   |
| HDL-C(mmol/L)                        | 1.16 (0.97,1.27)   |
| LDL-C(mmol/L)                        | 3.81±1.18          |
| VLDL-C(mmol/L)                       | 0.54 (0.42,0.71)   |
| HbA1c (%)                            | 8.9 (7.3,10.2)     |

Note: All values are expressed as mean ± SD or Median (interquartile range).

eGFR=estimated Glomerular filtration rate. UACR=Urinary albumin/creatinine. CR=Creatinine. UA= Uric Acid. TG=Triglycerides. HDL-C=High-density lipoprotein cholesterol. LDL-C=Low-density lipoprotein cholesterol. VLDL-C=Very low-density lipoprotein cholesterol. HbA1c= Hemoglobin.
